# Supplementary material for: The Role of Sulphonic and Phosphoric Pendant Groups on the Diffusion of Monovalent Ions in Polyelectrolyte Membranes: A Molecular Dynamics Study
Source: MDPI journal article supplement (doi:10.3390/membranes11120940), 2021-11-28
Supplement: s1 [file s1]

# The Role of Sulphonic and Phosphoric Pendant Groups on the Diffusion of Monovalent ions in Polyelectrolyte Membranes: A molecular dynamics study

Ismail Abdulazeez <sup>1,\*</sup>, Billel Salhi <sup>1</sup>, Nadeem Baig <sup>1</sup>, Isam H. Aljundi <sup>1,2,\*</sup> and Qing Peng <sup>3,4,5,\*</sup>

<sup>1</sup> Interdisciplinary Research Center for Membranes and Water Security, King Fahd University of Petroleum and Minerals, Dhahran 31261 Saudi Arabia

<sup>2</sup> Chemical Engineering Department, King Fahd University of Petroleum and Minerals, Dhahran 31261 Saudi Arabia

<sup>3</sup> Physics Department, King Fahd University of Petroleum and Minerals, Dhahran 31261 Saudi Arabia

<sup>4</sup> KACARE Energy Research and Innovation Center at Dhahran, Dhahran 31261 Saudi Arabia

<sup>5</sup> Hydrogen and Energy Storage Center, King Fahd University of Petroleum and Minerals, Dhahran 31261, Saudi Arabia

\* Correspondence: ismail.abdulazeez@kfupm.edu.sa (IA); aljundi@kfupm.edu.sa (I.H.A); qing.peng@kfupm.edu.sa (QP)

## Supplementary Information

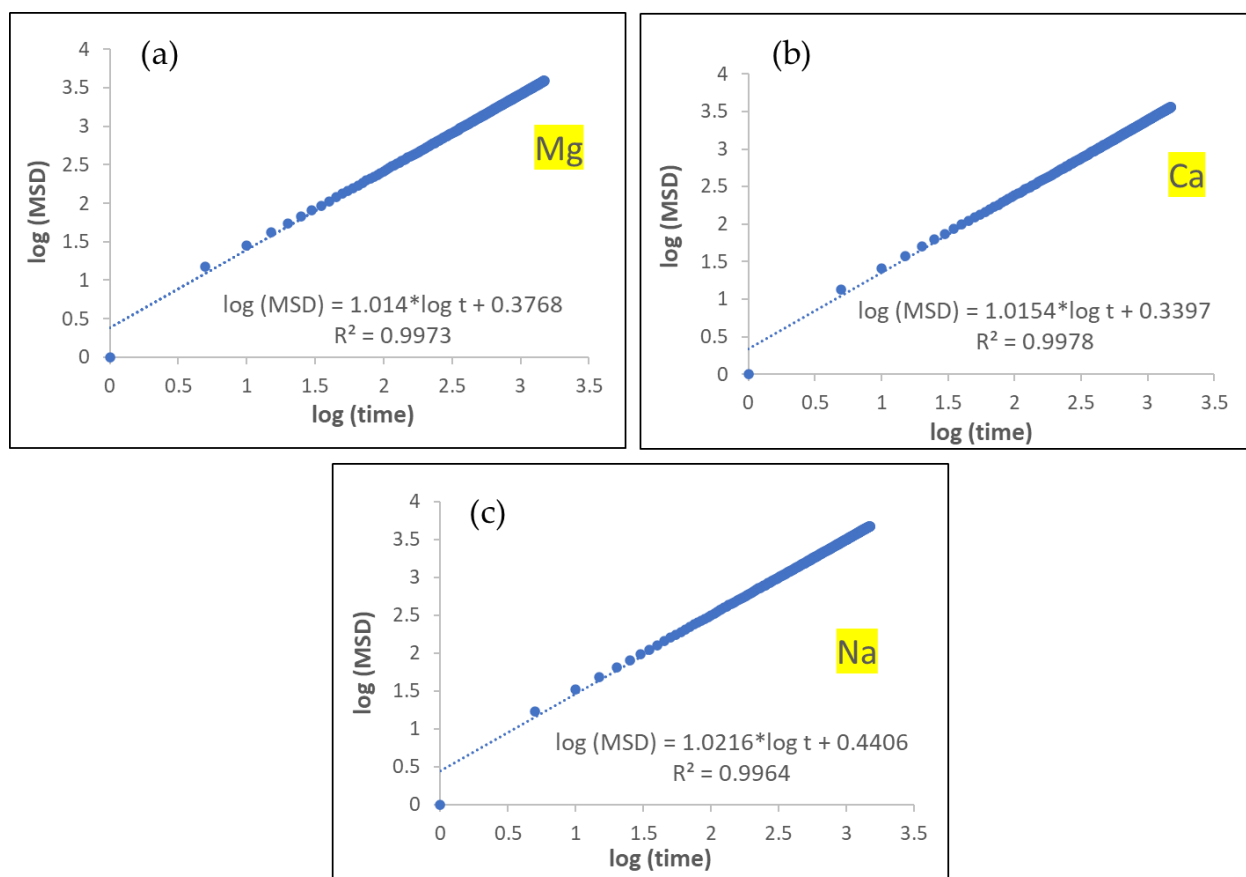

**Figure S1.** log (MSD) vs log t plots of (a) Mg<sup>2+</sup>, (b) Ca<sup>2+</sup> and (c) Na<sup>+</sup> ions.
